# Supplementary material
Source: PubMed Central journal article supplement (PMC4874398)
Supplement: rstb20150302supp1.pdf [file rstb20150302supp1.pdf]

**Supplementary material  
to**

Marxer M, Vollenweider V, Schmid-Hempel P:  
"Insect antimicrobial peptides act synergistically to inhibit a trypanosome parasite"

**Table S1** Amino acid sequences of the active parts of the three antimicrobial peptides used in this study. The used sequences were - at time of the study - modeled after the case of *B. pascuorum*, but enriched by EST-information from *B. terrestris*. See also Figure S6 for alignments of currently known sequences in different species.

| Peptide              | Amino acid sequence                                                                                   |
|----------------------|-------------------------------------------------------------------------------------------------------|
| <i>Abaecin</i>       | FVPYNPPRPGQSKPFPTFFPGHGPFNPKIQWPYPLPNPGH                                                              |
| <i>Hymenoptaecin</i> | HADPQGSLVINGKKPLSGPDRRPSLDVDYHQRVYDRNGMNADAYGGLNIRPGQPA<br>QPHLGVQIQREYKNGFIRGYSQAERGPGRISPSFGVGGGFRF |
| <i>Defensin</i>      | VTCDLLSIKGVAEHSACAANCLSMGKAGGRCENGVCLCRKTNFKDLWDKRF                                                   |

**Table S2.** Summary table for peptide concentrations (in  $\mu\text{M}$ ) of each of the three AMPs applied singly – *Abaecin*, *Defensin* and *Hymenoptaecin*, and which yielded the maximum effect on each of the eight strains tested, and for the three estimated growth parameters – lag phase  $\lambda$ , maximal growth rate  $\mu$ , and maximal cell numbers, maxA (see Fig. 1, main text). Parameters are measured from three replicates of each strain tested.

| Strain ID    | AMPs          | Lag phase, $\lambda$ <sup>a,b</sup> |                 | Growth rate, $\mu$ <sup>a,b</sup> |              | Level, max A <sup>a,b</sup>     |              |
|--------------|---------------|-------------------------------------|-----------------|-----------------------------------|--------------|---------------------------------|--------------|
|              |               | Concentration ( $\mu\text{M}$ )     | Max. Lag        | Concentration ( $\mu\text{M}$ )   | Min. Grow    | Concentration ( $\mu\text{M}$ ) | Min. A       |
| <b>08068</b> | Abaecin       | 0                                   | 0.000           | 40                                | 0.002        | 40                              | 0.276        |
|              | Defensin      | 0                                   | ND              | 40                                | 0.004        | 20                              | 0.217        |
|              | Hymenoptaecin | 20                                  | 0.000           | 40                                | 0.002        | 40                              | 0.230        |
| <b>08075</b> | Abaecin       | 40                                  | 0.951           | 0                                 | 0.002        | 0                               | 0.262        |
|              | Defensin      | 0                                   | ND              | 10                                | 0.002        | 10                              | 0.242        |
|              | Hymenoptaecin | 10                                  | 1.258           | 0                                 | 0.002        | 0                               | 0.208        |
| <b>08076</b> | Abaecin       | 0                                   | 0.000           | 20                                | <b>0.001</b> | 20                              | 0.174        |
|              | Defensin      | 0                                   | ND              | 2.5                               | 0.006        | 10                              | 0.215        |
|              | Hymenoptaecin | 40                                  | 0.000           | 20                                | <b>0.001</b> | 20                              | 0.188        |
| <b>08157</b> | Abaecin       | 40                                  | 25.551          | 0                                 | 0.002        | 40                              | 0.251        |
|              | Defensin      | 0                                   | ND <sup>1</sup> | 20                                | 0.004        | 0                               | <b>0.171</b> |
|              | Hymenoptaecin | 0                                   | 0.000           | 40                                | 0.002        | 40                              | 0.272        |
| <b>08161</b> | Abaecin       | 0                                   | 25.735          | 20                                | 0.004        | 20                              | 0.345        |
|              | Defensin      | 0                                   | ND              | 20                                | 0.002        | 40                              | 0.314        |
|              | Hymenoptaecin | 0                                   | 1.921           | 20                                | 0.003        | 20                              | 0.275        |
| <b>08261</b> | Abaecin       | 0                                   | 10.234          | 0                                 | 0.003        | 0                               | 0.318        |
|              | Defensin      | 0                                   | ND              | 20                                | 0.002        | 20                              | 0.243        |
|              | Hymenoptaecin | 20                                  | 10.970          | 0                                 | 0.002        | 0                               | 0.259        |
| <b>10208</b> | Abaecin       | 20                                  | 4.934           | 40                                | 0.003        | 20                              | 0.304        |
|              | Defensin      | 0                                   | ND              | 0                                 | 0.004        | 20                              | 0.317        |
|              | Hymenoptaecin | 0                                   | 0.000           | 40                                | 0.003        | 40                              | 0.324        |
| <b>10361</b> | Abaecin       | 20                                  | <b>38.127</b>   | 0                                 | 0.003        | 0                               | 0.302        |
|              | Defensin      | 0                                   | ND              | 0                                 | 0.003        | 0                               | 0.285        |
|              | Hymenoptaecin | 0                                   | 17.313          | 20                                | 0.002        | 40                              | 0.242        |

(a) Bold font indicates the maximal effect.

(b) ND: No detectable effect found.

## Figures

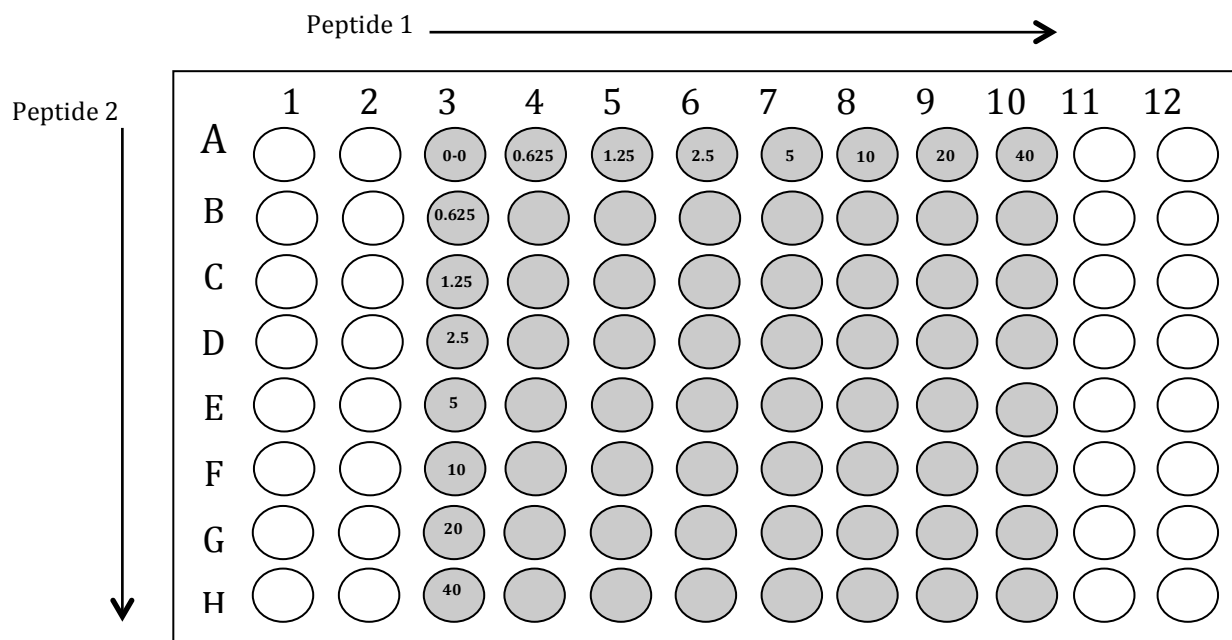

**Figure S1.** Schematic view of a 96-well plate matrix used for the peptide combination assay of two different antimicrobial peptides inhibiting the growth of *C. bombi* cells.

A treatment matrix was created with a peptide concentration dilution series of the first peptide in rows (0, 0.625, 1.25, 2.5, 5, 10, 20 and 40  $\mu\text{M}$ ) and the second peptide dilution series in columns (0, 0.625, 1.25, 2.5, 5, 10, 20 and 40  $\mu\text{M}$ ). Hence, a total of 64 distinct peptide combination treatments were generated per plate. Each specific combination/concentration was replicated three times on different plates, and the position of a given combination/concentration rotated on each plate.

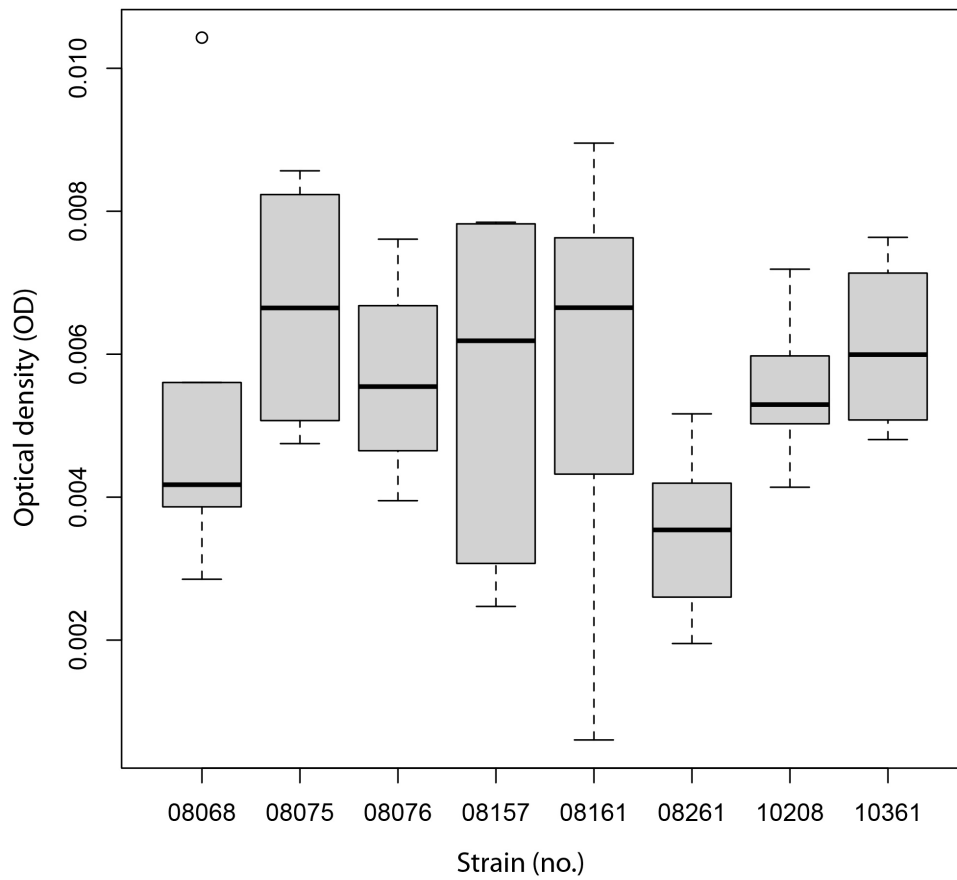

**Figure S2.** Boxplot of the maximum growth rates (OD), as estimated from fitting a spline with *grofit()*, for the eight tested strains (strain nos.) and under control conditions with no AMPs present (one-way ANOVA for the effect of strain:  $F_{7,33}=1.06$ ,  $P=0.4$ ). Each strain was tested in six replicates.

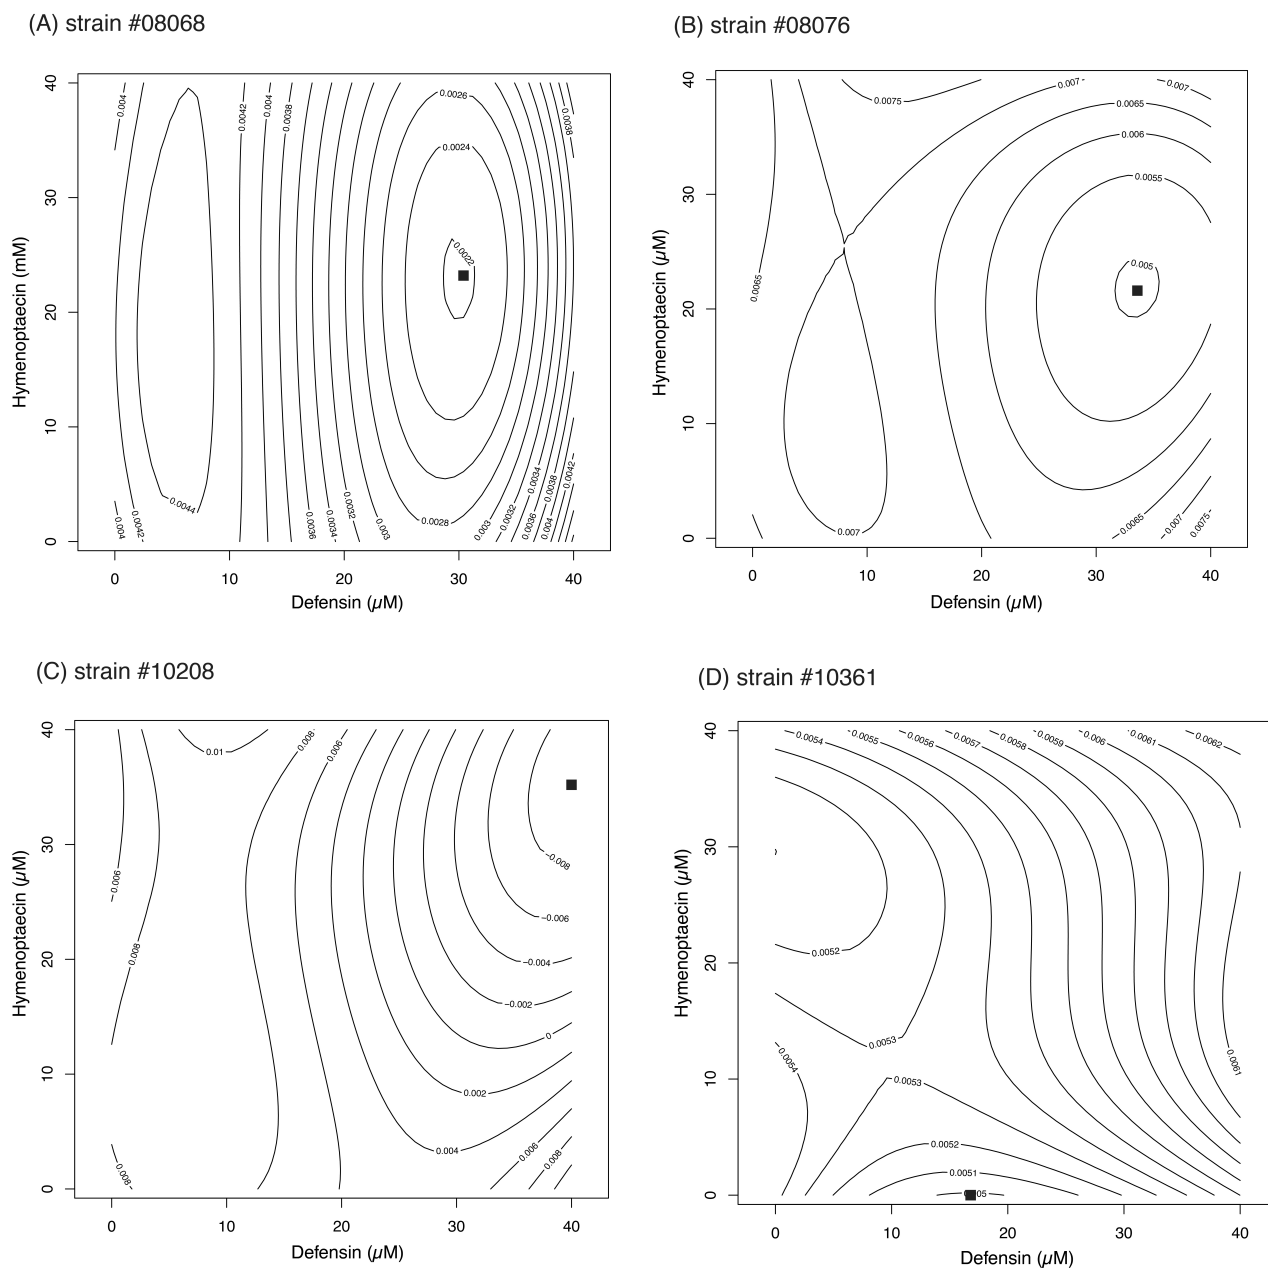

**Figure S3.** Contour plots representing maximal growth rates ( $\mu$ ; see Fig.1 in text) of four different *C. bombi* strains in the treatment with combinations of *Defensin* and *Hymenoptaecin*.

The observed growth rates are fitted with a least-square surface of 3<sup>rd</sup> polynomial order, which is shown here as a contour plot landscape. Lines represent the isobars and correspond to the effects of the interaction of both antimicrobial peptides, *Hymenoptaecin* and *Defensin* on maximal growth rate (measured as optical density) against four different *C. bombi* strains – strain nos. 08068 (A), 08076 (B), 10208 (C) and 10361 (D). Concentrations of antimicrobial peptides (x and y-axis) are in units of  $\mu\text{M}$ . The black square in each graph marks the optimal combination-concentration needed to reduce this parasite strain's growth rate to a minimum.

(A) Abaecin x Defensin, all strains

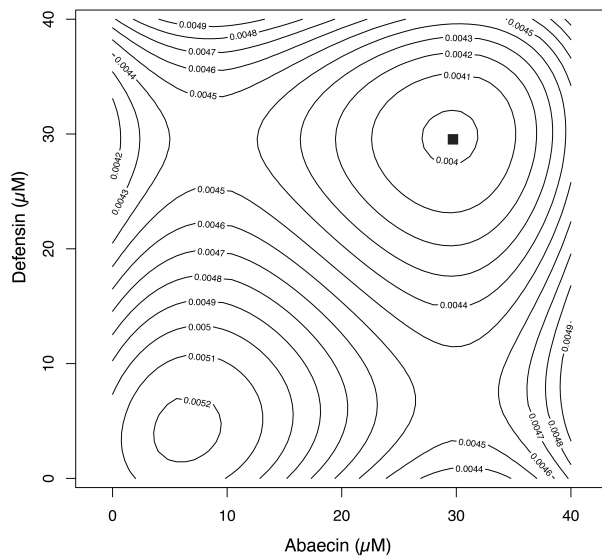

(B) Abaecin x Hymenoptaecin, all strains

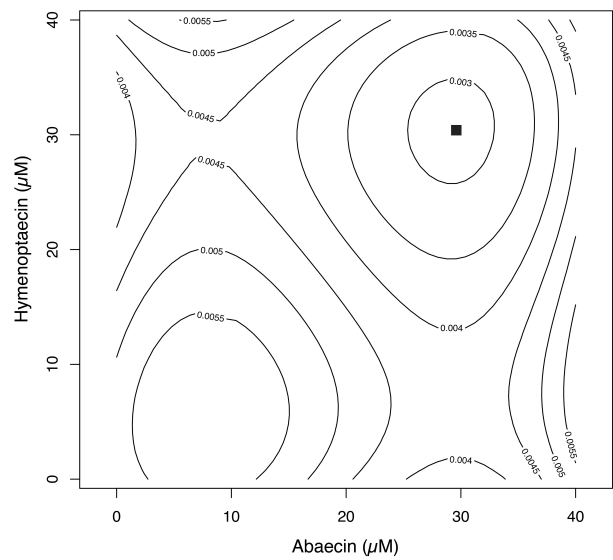

(C) Defensin x Hymneoptaecin, all strains

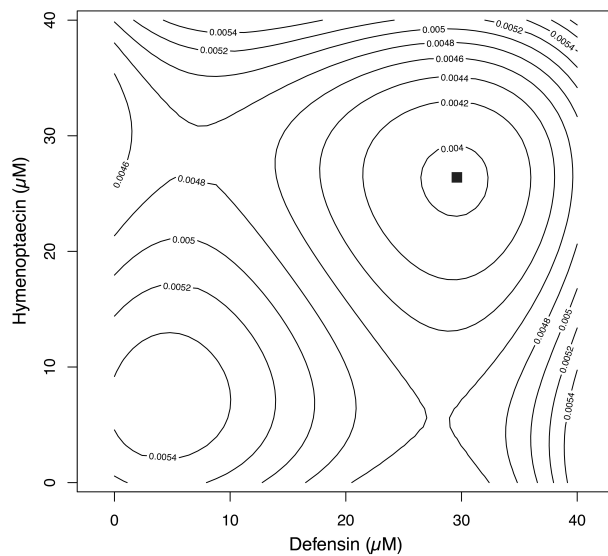

**Figure S4.** Contour plots representing maximal growth rates ( $\mu$ ; see Fig.1 in text) achieved from the pooled results of testing the eight different *C. bombi* strains. Here, the combination of AMP varies with: (A) *Abaecin* and *Defensin*, (B) *Abaecin* and *Hymenoptaecin*, and (C) *Defensin* and *Hymenoptaecin*. The black square in each graph marks the optimal combination-concentration needed to reduce the parasite growth rate to a minimum. For further explanations, see Fig. S3.

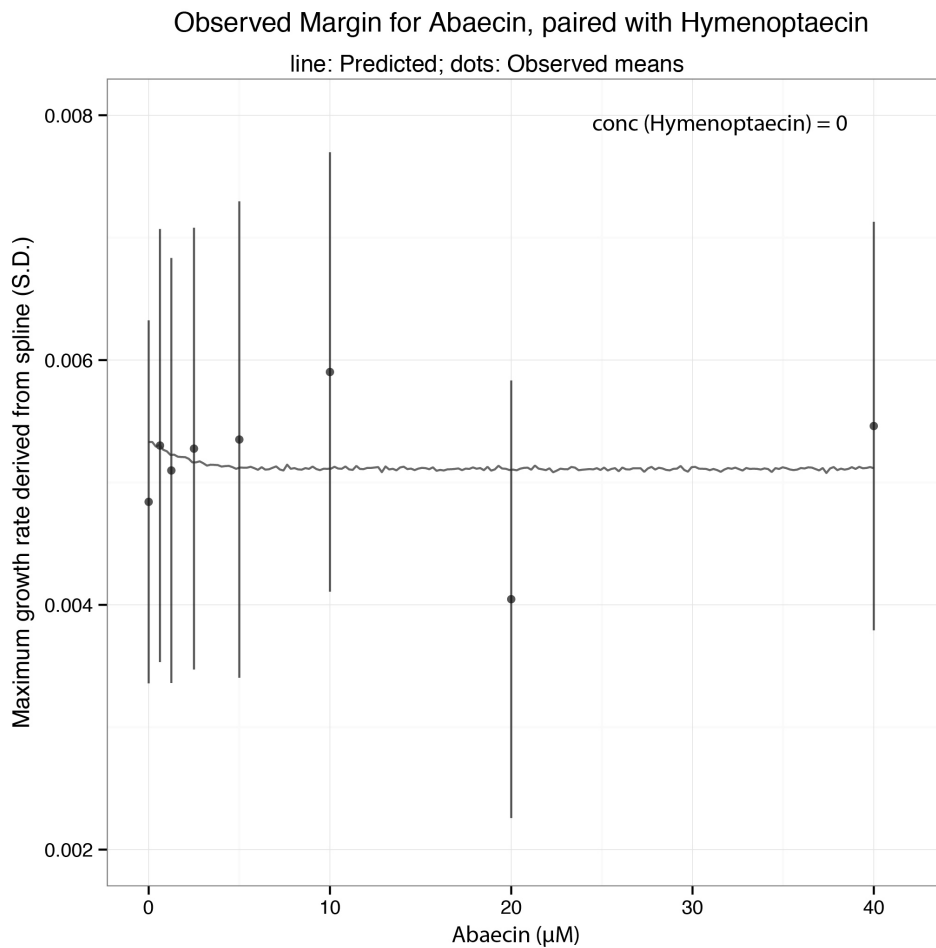

**Figure S5.** The second "margin" (*c.f.* Fig.3 of main text) of the two-peptide combination assay *Abaecin* x *Hymenoptaecin*. Shown are the observed means (dots, S.D.) of the estimated growth rates from spline when only one AMP (*Abaecin*) is varied across a range of concentrations (0, 0.625, 1.25, 2.5, 5, 10, 20 and 40  $\mu\text{M}$ ), and the other one (*Hymenoptaecin*) is not used. The line is the fitted Hill equation as a standard model for the dose-response curve (see Methods). At each concentration, three replicates were measured. The dose-response curve was subsequently used to calculate the expectations for a combined use of the two peptides.



**Figure S6.** Aligned sequences of bumblebee *Abaecin*, *Defensin*, and *Hymenoptaecin*. *Bombus*-species as indicated; accession number given. Sequences were retrieved by BLAST from NCBI and aligned with MacVector V 14.5.

### (1) Abaecin

#### Abaecin: Formatted Alignments

|            |                          |    |                                                                               |    |
|------------|--------------------------|----|-------------------------------------------------------------------------------|----|
| terrestris | XP_003394701.11:28-85    | 1  | MKAVMFI FV MLATI CG I LAFVPYNPPRPGQSKPFP T FPGH                               | 40 |
| ignitus    | AAQ90411.11:1-58         | 1  | MKAVMFI FV MLATI CG I LAFVPYNPPRPGQSKPFP T FPGH                               | 40 |
| impatiens  | XP_003491544.11:1-58     | 1  | MKAVMFI FV MLATI VCA I LAFVPYNPPRPGQSKPFP S FPGH                              | 40 |
| impatiens  | ADB29128.11:2-43         | 1  | I L A FV PYNPPRPGQSKPFP T F G H G P F N P K I QWPYPL P N P                    | 40 |
| pascuorum  | P81463.11ABAE_BOMPA:1-39 | 1  | F V P Y N P P R P G Q S K P F P S F P G H G P F N P K I Q W P Y P L P N P G H | 39 |
|            |                          |    | MKAVMFI F .MLAT . C . I LAFVPYNPPRPGQSKPFP . FPGH                             |    |
| terrestris | XP_003394701.11:28-85    | 41 | G P F N P K I Q W P Y P L P N P G H                                           | 58 |
| ignitus    | AAQ90411.11:1-58         | 41 | G P F N P K I Q W P Y P L P N P G H                                           | 58 |
| impatiens  | XP_003491544.11:1-58     | 41 | G P F N P K I Q W P Y P L P N P G H                                           | 58 |
| impatiens  | ADB29128.11:2-43         | 41 | G H                                                                           | 42 |
| pascuorum  | P81463.11ABAE_BOMPA:1-39 | 40 |                                                                               | 39 |
|            |                          |    | G P F N P K I Q W P Y P L P N P G H                                           |    |

### (2) Defensin

#### Defensin: Formatted Alignments

|            |                      |    |                                                                                                   |    |
|------------|----------------------|----|---------------------------------------------------------------------------------------------------|----|
| ignitus    | AAQ90412.11:4-96     | 1  | VYFLVALLFVAVAA IMAAPVEEEYELLEQAGIEERADRQR                                                         | 40 |
| terrestris | ADB29129.11:1-93     | 1  | VYFLVALLFVAVAA IMAAPVEEEYELLEQAGIEERADRQR                                                         | 40 |
| terrestris | NP_001267838.11:4-96 | 1  | VYFLVALLFVAVAA IMAAPVEEEYELLEQAGIEERADRQR                                                         | 40 |
| ignitus    | ACA04901.11:4-96     | 1  | VYFLVALLFVAVAA IMAAPVEEEYELLEQAGIEERADRQR                                                         | 40 |
| impatiens  | XP_003486350.11:4-96 | 1  | VYFLVALLFVAVAA IMAAPVEEEYEL P L E H A G I E E R A D R Q R R V T C D L S I K G V A E H S A C A A N | 40 |
| pascuorum  | AGM53452.11:1-59     | 1  | E E Y E P L E H A G I E E R A D R Q R R V T C D L S I K G V A E H S A C A A N                     | 40 |
| terrestris | ACO90198.11:1-42     | 1  | V A E H S A C A A N C L S M G K A G G R C E N G V C L C R K T N F K D L W D K R                   | 40 |
|            |                      |    | VYFLVALLFVAVAA IMAAPVEEEYELLEQAGIEERADRQR                                                         |    |
| ignitus    | AAQ90412.11:4-96     | 41 | R V T C D L L S I K G V A E H S A C A A N C L S M G K A G G R C E N G V C L C R                   | 80 |
| terrestris | ADB29129.11:1-93     | 41 | R V T C D L L S I K G V A E H S A C A A N C L S M G K A G G R C E N G V C L C R                   | 80 |
| terrestris | NP_001267838.11:4-96 | 41 | R V T C D L L S I K G V A E H S A C A A N C L S M G K A G G R C E N A V C L C R                   | 80 |
| ignitus    | ACA04901.11:4-96     | 41 | R V T C D L L S I K G V A E H S A C A A N C L S M G K A G G R C E N G V C L W R                   | 80 |
| impatiens  | XP_003486350.11:4-96 | 41 | R V T C D L L S I K G V A E H S A C A A N C L S M G K A G G R C E N G V C L C R                   | 80 |
| pascuorum  | AGM53452.11:1-59     | 41 | C L S M G K A G G R C E N G I C L C R                                                             | 59 |
| terrestris | ACO90198.11:1-42     | 41 | F G                                                                                               | 42 |
|            |                      |    | R V T C D L L S I K G V A E H S A C A A N C L S M G K A G G R C E N G V C L C R                   |    |
| ignitus    | AAQ90412.11:4-96     | 81 | K T N F K D L W D K R F G                                                                         | 93 |
| terrestris | ADB29129.11:1-93     | 81 | K T N F K D L W D K R F G                                                                         | 93 |
| terrestris | NP_001267838.11:4-96 | 81 | K T N F K D L W D K R F G                                                                         | 93 |
| ignitus    | ACA04901.11:4-96     | 81 | K T N F K D L W D K R F G                                                                         | 93 |
| impatiens  | XP_003486350.11:4-96 | 81 | K T N F K D L W D K R F G                                                                         | 93 |
| pascuorum  | AGM53452.11:1-59     | 60 |                                                                                                   | 59 |
| terrestris | ACO90198.11:1-42     | 43 |                                                                                                   | 42 |
|            |                      |    | K T N F K D L W D K R F G                                                                         |    |
